# Supplementary material for: MiR-21 Is Required for the Epithelial–Mesenchymal Transition in MDA-MB-231 Breast Cancer Cells
Source: MDPI journal article supplement (doi:10.3390/ijms22041557), 2021-02-04
Supplement: s1 [file s1]

Supplementary Material

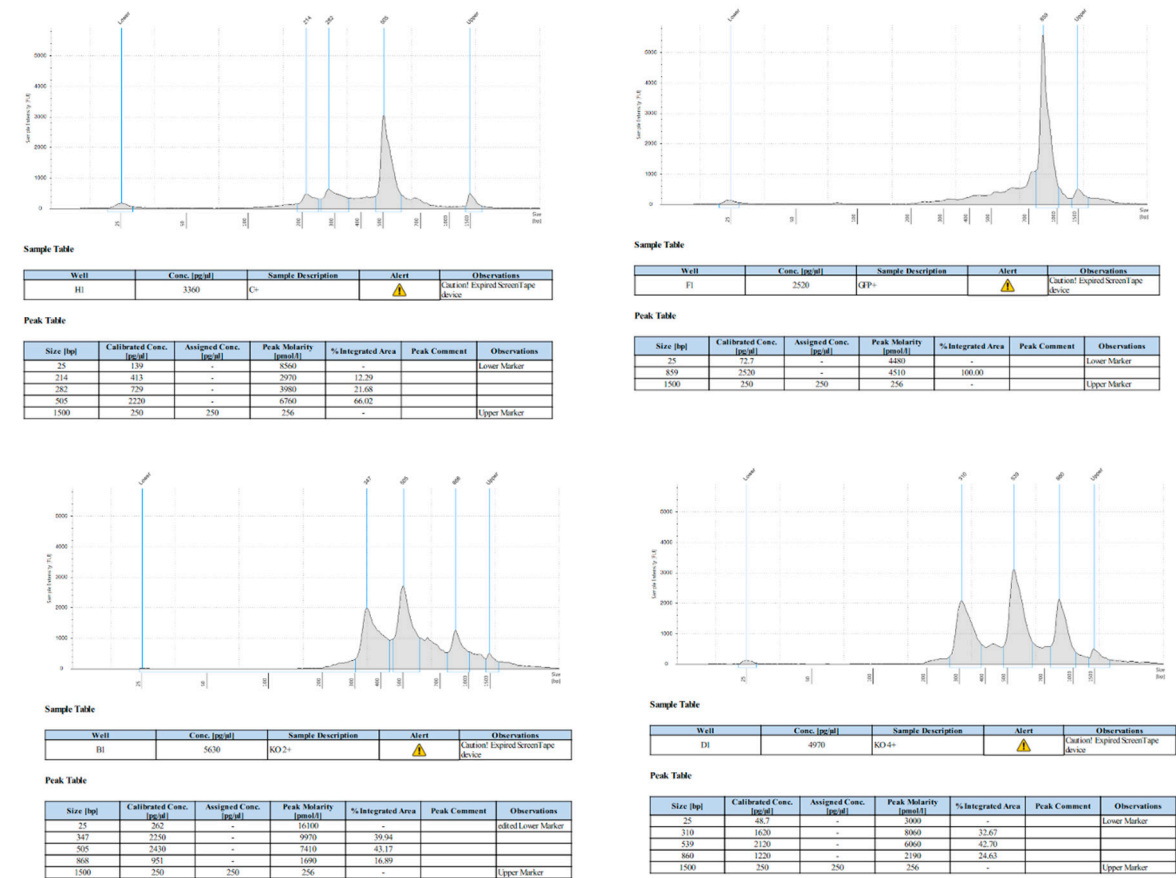

**Figure S1.** Cas9-gRNA editing efficiency could be estimated directly from Sanger electropherograms of short polymerase chain reaction products around the gRNA regions in Cas9-gRNA transduced cells.

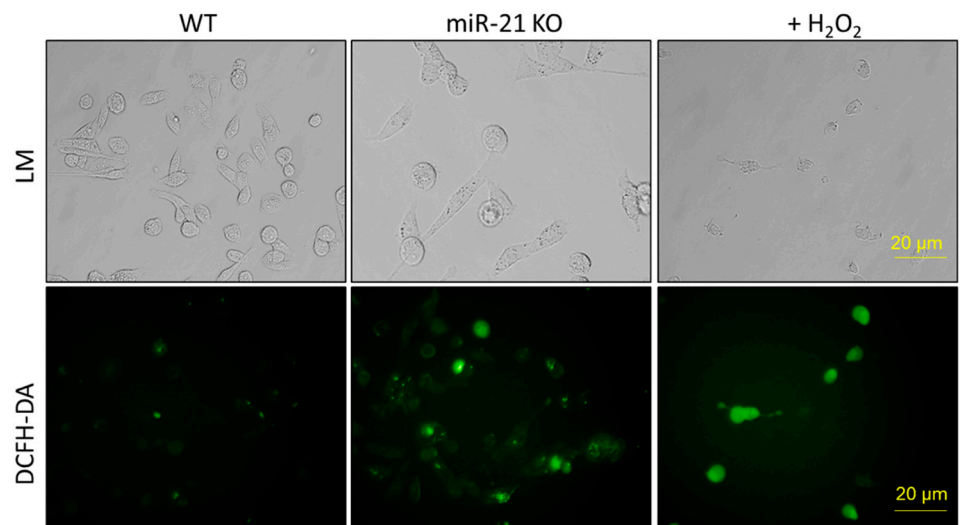

**Figure S2.** miR-21 deletion resulted in an increased ROS generation KO2 and KO4.

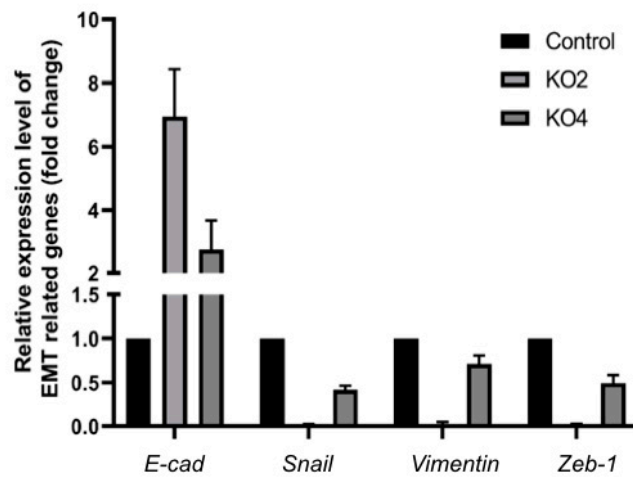

**Figure S3.** The mRNA expression levels of *E-cadherin*, *Snail*, *Vimentin*, and *Zeb-1* were examined by qRT-PCR by using WT, KO2, and KO4, RNA polymerase II (RPII) was used as a reference gene ( $n=6$ ;  $p<0.005$  for all).

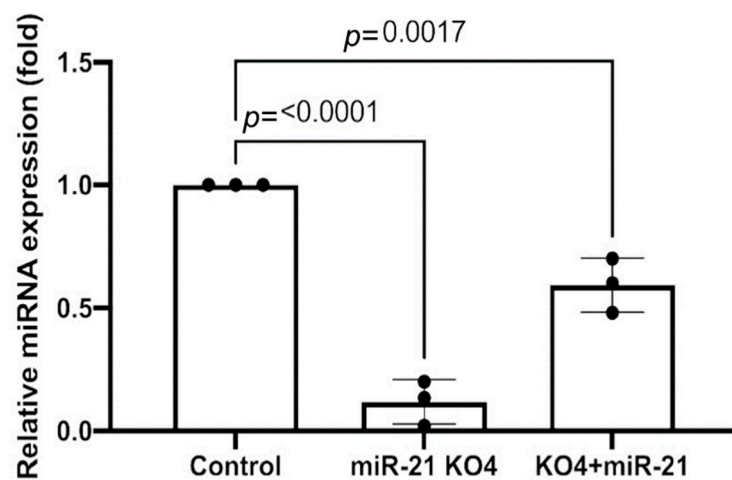

**Figure S4.** The miRNA expression levels of control, KO4 and miR21+, were examined by qRT-PCR, U6 was used as a reference gene. Exact p-values are indicated, error bars show SD;  $n=3$  biological replicates for all).
